# Supplementary material
Source: MDPI journal article supplement (https://www.mdpi.com/2076-3417/14/6/2473)
Supplement: s1 [file s1 › applsci-2905354-supplementary.pdf]

**Table S1.** Qualitative analysis of the production of the fibres.

| <b>Samples</b>   | <b>Produced</b>          | <b>Qualitative surface analysis</b>       |
|------------------|--------------------------|-------------------------------------------|
| Fu_30_10         | Yes, but with difficulty | Roughened                                 |
| Fu_30_20         | Yes, but with difficulty | Roughened                                 |
| Fu_30_30         | Yes                      | Unblemished                               |
| Fh_30_10         | Yes, but with difficulty | Roughened                                 |
| Fh_30_20         | Yes, but with difficulty | Roughened                                 |
| Fh_30_30         | Yes                      | Unblemished                               |
| PCF_30_10/40_130 | Yes                      | Unblemished                               |
| PCF_30_10/40_140 | Yes                      | Unblemished                               |
| PCF_30_10/40_150 | Yes                      | Unblemished                               |
| PCF_30_10/60_130 | Yes, but with difficulty | Roughened                                 |
| PCF_30_10/60_140 | Yes                      | Unblemished                               |
| PCF_30_10/60_150 | Yes                      | Unblemished                               |
| PCF_30_10/80_130 | Yes                      | Unblemished                               |
| PCF_30_10/80_140 | Yes                      | Unblemished                               |
| PCF_30_10/80_150 | Yes                      | Unblemished                               |
| PCF_30_20/40_130 | Yes                      | Unblemished                               |
| PCF_30_20/40_140 | Yes                      | Unblemished                               |
| PCF_30_20/40_150 | Yes                      | Unblemished                               |
| PCF_30_20/60_130 | Yes                      | Unblemished                               |
| PCF_30_20/60_140 | Yes, but with difficulty | Roughened                                 |
| PCF_30_20/60_150 | Yes, but with difficulty | Roughened and clogged the needle          |
| PCF_30_20/80_130 | Yes, but with difficulty | Roughened                                 |
| PCF_30_20/80_140 | Yes, but with difficulty | Roughened                                 |
| PCF_30_20/80_150 | Yes, but with difficulty | Roughened                                 |
| PCF_30_30/40_130 | Yes                      | Unblemished                               |
| PCF_30_30/40_140 | Yes                      | Unblemished                               |
| PCF_30_30/40_150 | Yes                      | Unblemished                               |
| PCF_30_30/60_130 | Yes                      | Unblemished                               |
| PCF_30_30/60_140 | Yes                      | Unblemished                               |
| PCF_30_30/60_150 | Yes                      | Unblemished                               |
| PCF_30_30/80_130 | Yes                      | Unblemished                               |
| PCF_30_30/80_140 | Yes                      | Unblemished                               |
| PCF_30_30/80_150 | Yes                      | Unblemished                               |
| Fu_50_10         | Yes                      | Unblemished                               |
| Fu_50_20         | Yes, but with difficulty | Roughened                                 |
| Fu_50_30         | No                       | Very viscous solution, clogged the needle |
| Fh_50_10         | Yes                      | Unblemished                               |
| Fh_50_20         | Yes, but with difficulty | Roughened                                 |
| Fh_50_30         | No                       | Very viscous solution, clogged the needle |
| PCF_50_10/40_130 | Yes                      | Unblemished                               |
| PCF_50_10/40_140 | Yes                      | Unblemished                               |
| PCF_50_10/40_150 | Yes, but with difficulty | Roughened                                 |
| PCF_50_10/60_130 | Yes                      | Unblemished                               |
| PCF_50_10/60_140 | Yes                      | Unblemished                               |
| PCF_50_10/60_150 | Yes, but with difficulty | Roughened                                 |

| Samples          | Produced                 | Qualitative surface analysis              |
|------------------|--------------------------|-------------------------------------------|
| PCF_50_10/80_130 | Yes, but with difficulty | Roughened                                 |
| PCF_50_10/80_140 | Yes                      | Unblemished                               |
| PCF_50_10/80_150 | Yes                      | Unblemished                               |
| PCF_50_20/40_130 | Yes, but with difficulty | Roughened and clogged the needle          |
| PCF_50_20/40_140 | Yes, but with difficulty | Roughened and clogged the needle          |
| PCF_50_20/40_150 | Yes, but with difficulty | Roughened                                 |
| PCF_50_20/60_130 | Yes, but with difficulty | Roughened                                 |
| PCF_50_20/60_140 | Yes, but with difficulty | Roughened and clogged the needle          |
| PCF_50_20/60_150 | Yes, but with difficulty | Roughened                                 |
| PCF_50_20/80_130 | Yes, but with difficulty | Roughened                                 |
| PCF_50_20/80_140 | Yes, but with difficulty | Roughened                                 |
| PCF_50_20/80_150 | Yes, but with difficulty | Roughened                                 |
| PCF_50_30/40_130 | No                       | Very viscous solution, clogged the needle |
| PCF_50_30/40_140 | No                       | Very viscous solution, clogged the needle |
| PCF_50_30/40_150 | No                       | Very viscous solution, clogged the needle |
| PCF_50_30/60_130 | No                       | Very viscous solution, clogged the needle |
| PCF_50_30/60_140 | No                       | Very viscous solution, clogged the needle |
| PCF_50_30/60_150 | No                       | Very viscous solution, clogged the needle |
| PCF_50_30/80_130 | No                       | Very viscous solution, clogged the needle |
| PCF_50_30/80_140 | No                       | Very viscous solution, clogged the needle |
| PCF_50_30/80_150 | No                       | Very viscous solution, clogged the needle |
| Fut_8            | Yes                      | Unblemished                               |
| Fht_8            | Yes                      | Unblemished                               |
| PCFt_8/40_100    | Yes                      | Unblemished                               |
| PCFt_8/80_120    | Yes                      | Unblemished                               |
